# Supplementary material
Source: PubMed Central journal article supplement (PMC6351976)

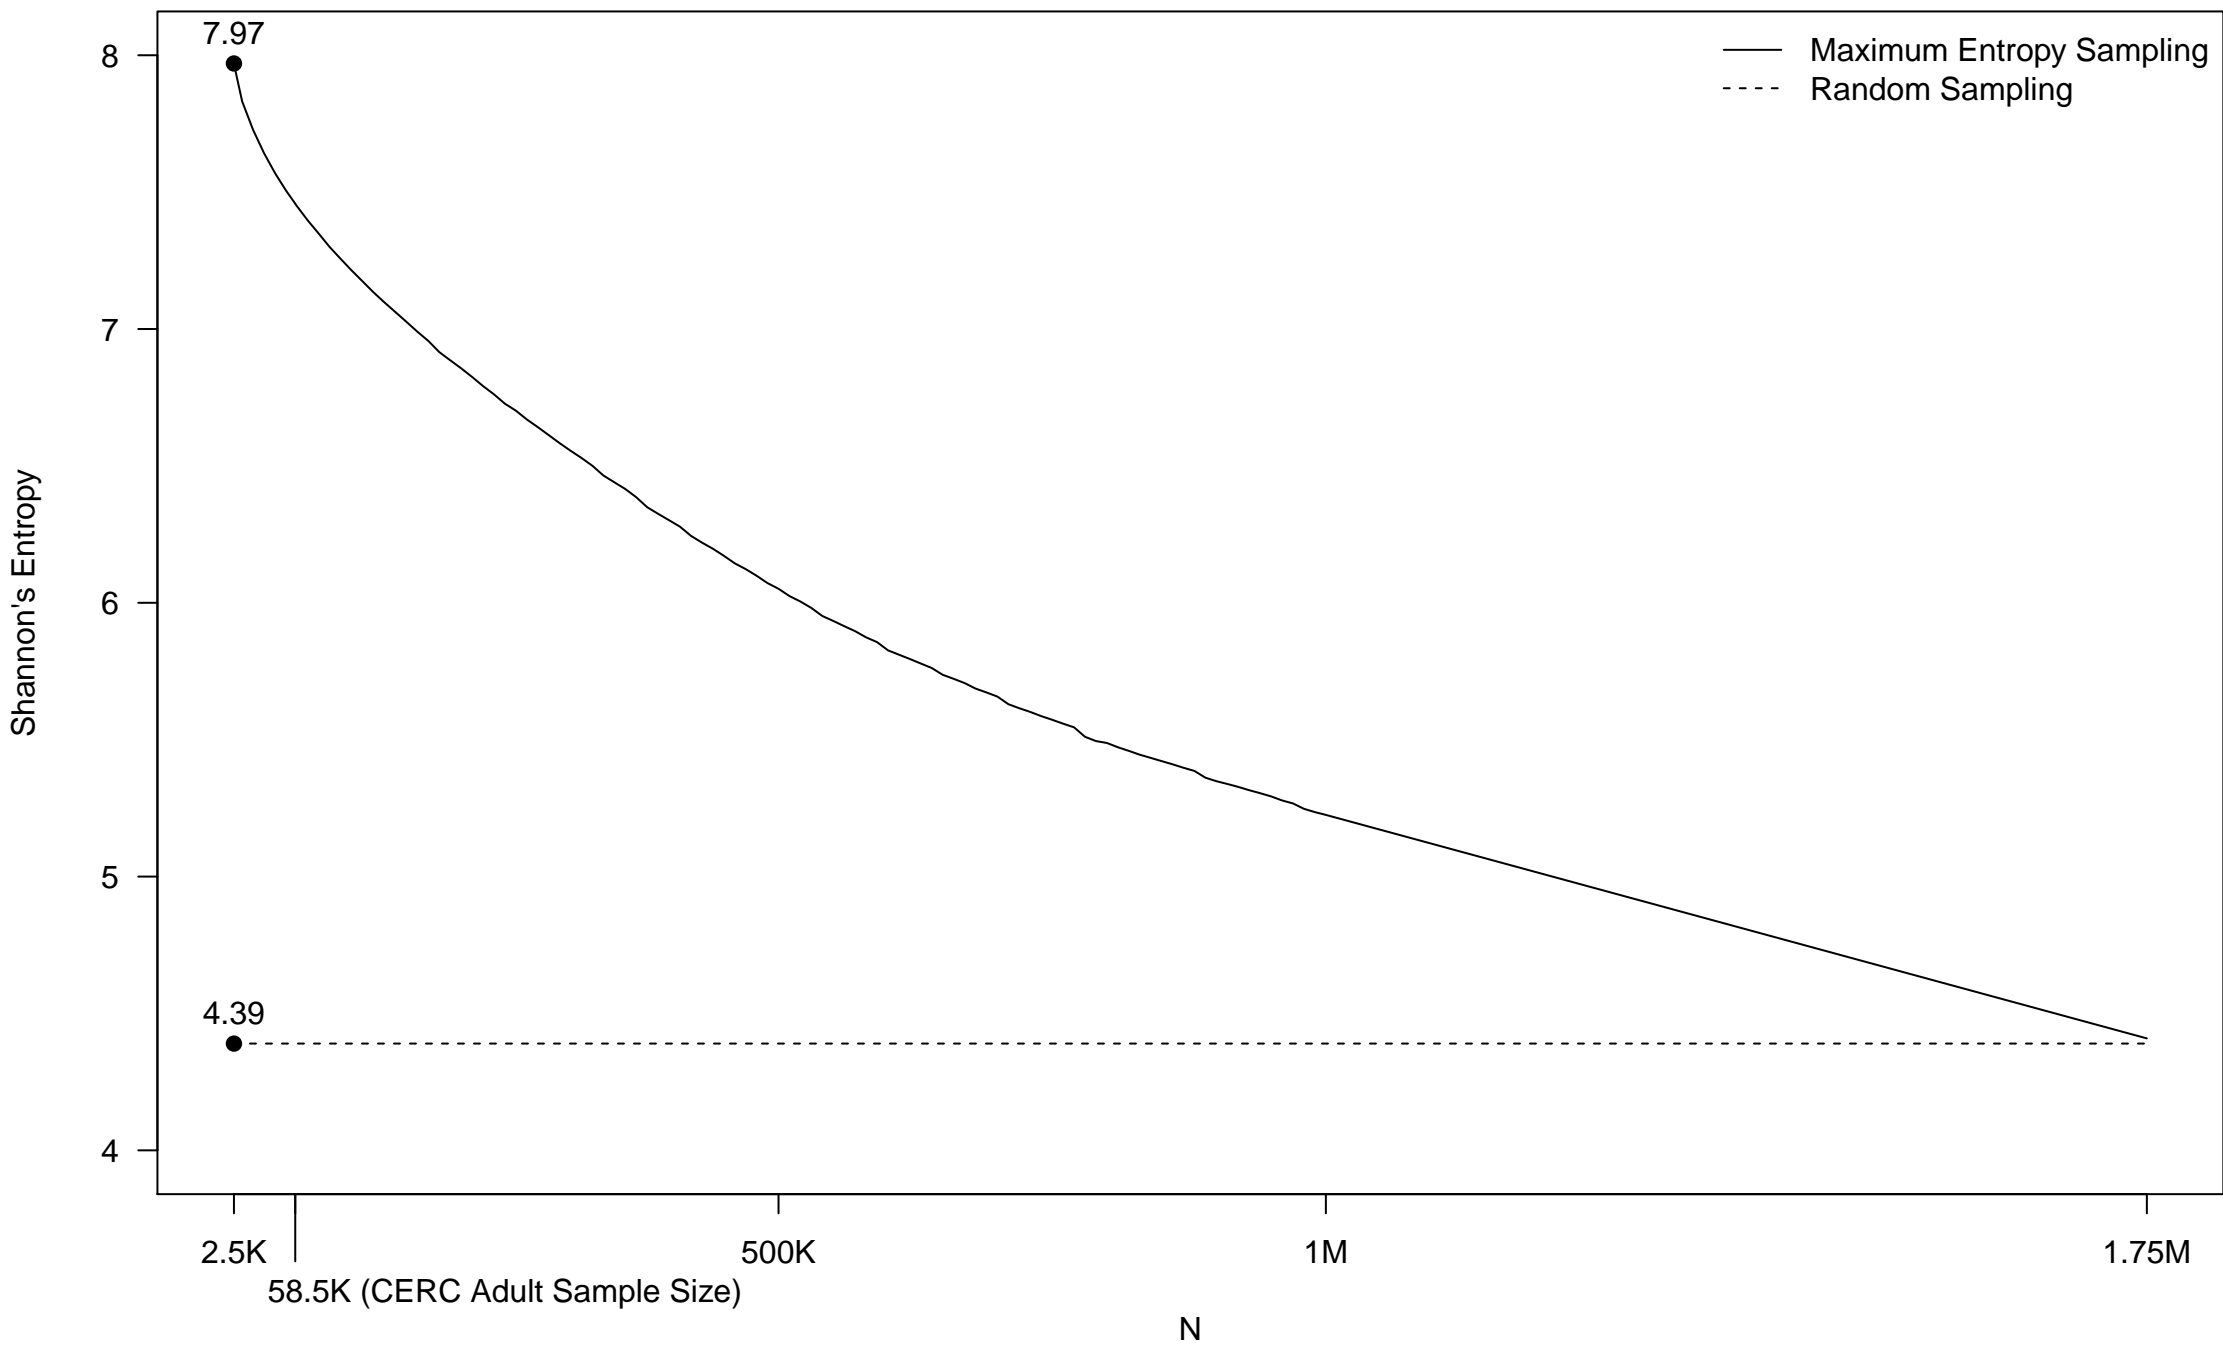

Supplement: ocy164_supp.pdf [file ocy164_supp.pdf]
